1 ***Predominance of clonal propagation conceals extinction risks of the highly***  
2 ***endangered floodplain herb *Cnidium dubium****

3 Ilona Leyer<sup>1</sup>, Birgit Ziegenhagen<sup>2</sup>, Christina Mengel<sup>2</sup>, Eva Mosner<sup>1</sup>, Sascha Liepelt<sup>2\*</sup>

4 <sup>1</sup> Department of Applied Ecology, Biodiversity and Ecosystem Functions, Geisenheim University, Germany

5 <sup>2</sup> Faculty of Biology, Conservation Biology, Philipps-University Marburg, Germany

6 \*Corresponding author: [liepelt@biologie.uni-marburg.de](mailto:liepelt@biologie.uni-marburg.de)

7

8 **Abstract**

9 Habitat loss and degradation due to human-induced landscape alterations are considered to  
10 be a major threat to biodiversity. The decline of biodiversity may occur with a time delay  
11 leading to a so called extinction debt. Therefore, determining extinction risks and  
12 conservation status is not always straightforward. Several life history traits might play a role  
13 for the accumulation of an extinction debt. Thus, perennial plant species capable of  
14 vegetative propagation might be able to persist temporarily in degraded habitats even  
15 though sexual and evolutionary processes are effectively halted.

16 We studied *Cnidium dubium*, which occurs in scattered patches along river corridors in  
17 Central Europe and is critically endangered in Germany. It is a perennial species which is able  
18 to propagate clonally. Our aims were to reconstruct demographic processes regarding clonal  
19 propagation and gene flow along 400 km of river stretch and with respect to the position in  
20 the floodplain, i.e. before or behind dykes. We also wanted to determine whether there is  
21 evidence for an extinction debt in *C. dubium* and to use our insights for conservation  
22 recommendations.

23 For this, we used nuclear microsatellites and maternally inherited chloroplast DNA markers  
24 and applied a systematic grid based sampling strategy for small scale geographic structures.

25 We observed a high level of clonal propagation. In 935 analysed plants we observed only  
26 121 different genotypes and of 50 studied patches of *C. dubium* the majority (31 patches)  
27 consisted of one single genotype each. Patch size and position were correlated with clonal

28 diversity. Large patches and patches behind dykes exhibited higher clonal diversity. There  
29 was no evidence for a large scale genetic substructuring of the study area and no differences  
30 in overall genetic diversity between upstream and downstream patches as well as between  
31 patches before and behind the dykes. High levels of heterozygosity and a high number of 18  
32 chloroplast DNA haplotypes together with a slightly elevated inbreeding coefficient ( $F_{is}$ )  
33 point toward a high level of ancestral polymorphism in an out of equilibrium population due  
34 to high levels of clonal propagation and low levels of gene flow and recombination.  
35 Therefore, we assume that an extinction debt is present in *C. dubium*. As a management  
36 strategy, we propose to transplant ramets between multiple patches to increase the number  
37 of mating partners and therefore restore sexual reproduction.

38

39

40 **Key words:** clonal diversity, Elbe River, extinction debt, floodplain fragmentation, gene flow,  
41 hydrochory, somatic mutation

42

### 43 **Introduction**

44 Human-induced alterations in landscape structure and concomitant loss of natural and semi-  
45 natural habitats pose a major threat to biodiversity (Tilman et al. 2001, Tschardt et al. 2011).  
46 Habitat loss can involve a concurrent decline in habitat area and connectivity as well as in the  
47 quality of habitat patches (Fahrig 2003, Sang et al. 2010). Reduced habitat area and isolation  
48 is accompanied by decreased population sizes and restricted gene flow within species (Honnay  
49 et al. 2005, Duwe et al. 2017, Lee et al. 2018). Together with deteriorating habitat quality,  
50 survival and reproduction of individuals are threatened and their fitness is reduced (Colling &  
51 Matthies 2006, Mortelliti et al. 2010). Decline of biodiversity in response to habitat loss can  
52 be an immediate evident, but extinction events might also occur with a time delay called  
53 “relaxation time” (Diamond et al. 1972) due to the phenomenon of extinction debt (Tilman et  
54 al. 1994, Hanski & Ovaskainen 2002). Extinction debt means that species in a local community  
55 are doomed to extinction due to altered environmental, e.g. habitat conditions, but the actual

56 extinction event has not yet occurred since species can persist for a time in small, isolated and  
57 degraded habitats (Kuussaari et al. 2009, Krauss et al. 2010). Extinction debt can lead to an  
58 underestimation of actual threats to biodiversity (Tilman et al. 1994, Bulman et al. 2007) as  
59 often only a simple count of species is used to evaluate conservation needs of habitats (Helm  
60 et al. 2005). Likewise, the vulnerability of individual species can be underestimated due to an  
61 extinction debt if the population size rather reflects the former area, connectivity and quality  
62 of the habitat rather than the current one (Tepedino 2012, Hylander & Ehrlén 2013). Thus,  
63 this phenomenon can easily remain unrecognized and should be taken into account when  
64 planning restoration schemes.

65 Although information is scarce on the influence of plant species traits on extinction debt,  
66 empirical evidence suggests that time-delayed extinctions are more likely to occur in long-  
67 lived species compared to short-lived ones. Thus, it can be assumed that perennial rather than  
68 annual plants as well as tree species may carry an extinction debt (Kuussaari et al. 2009).  
69 Furthermore, there is evidence that isolated populations of clonally propagating species can  
70 persist long after a habitat fragmentation event (Honnay et al. 2005). Reasons could be that  
71 they are more buffered against the heterogeneity of their habitats due to the reallocation of  
72 resources and division of labour among ramets of a genet. The probability of genet death can  
73 be reduced by spreading the risk over multiple ramets (Stuefer et al. 1996, Pennings &  
74 Callaway 2000, Honnay & Bossuyt 2005). Furthermore, there is evidence that vegetative  
75 reproduction can be maintained in habitats in which sexual reproduction is prevented, e.g.  
76 where ecological conditions become unfavorable for seed set, seed germination, or seedling  
77 establishment (Lindborg & Eriksson 2004). Thus, resulting population structure could be  
78 rather shaped by the former landscape than by the degree of fragmentation (Young et al.  
79 1996, Honnay et al. 2005, Llorens et al. 2018). Remnant populations of long-lived clonal plants  
80 might therefore appear large and viable, but might be doomed to extinction in the long run.  
81 Despite the benefits of clonal propagation, prolonged clonal growth can also be negative as it  
82 can limit the outcome of sexual reproduction due to e.g. limited resource allocation to  
83 flowering and seed production and the interference of vegetative reproduction with  
84 pollination and mating (Vallejo-Marín et al. 2010, Barrett 2015). Furthermore, the size and  
85 longevity of clonal populations could be associated with the accumulation of somatic  
86 mutations due to high numbers of somatic cell divisions in old clones potentially leading to  
87 degeneration (Bobiwash et al. 2013, Barrett 2015). These aspects illustrate clearly that

88 knowledge of clonal diversity and the extent of clonal structures is a necessary prerequisite to  
89 assess the threat to clonal plant populations and their chances of survival.

90 Floodplain habitats with their peculiar species communities belong to the most altered and  
91 fragmented ecosystems around the world. Many plant species and their habitats confined to  
92 river corridors have strongly declined in the last centuries due to hydrological alterations  
93 through river regulation by dams for e.g. navigation and hydroelectric power production  
94 (Lehner et al. 2011) as well as floodplain fragmentation by dykes (also called levees) for flood  
95 protection (Leyer 2005). Dykes have led to a dramatic decrease in the actively flooded area of  
96 nearly all river systems in Central Europe. In Germany, all major rivers (e.g. Rhine, Elbe, Oder,  
97 Danube) have lost more than two thirds of their active floodplains (BMU and BFN 2009).  
98 Behind the dykes, in the inactive floodplain, flooding and flow induced disturbances are  
99 prevented leading to accelerated settlement activities and land use intensification. Due to the  
100 poor state of these habitats and many of its representative plant species, they are part of  
101 strong conservation and restoration efforts (Mosner et al. 2012, Schindler et al. 2016).

102 As explained above, the assessment of threats to clonal species by floodplain fragmentation  
103 and deterioration is a challenge. However, as for population genetic effects, not only clonal  
104 diversity and the extent of clonal structures but also genetic diversity and differentiation  
105 affected by gene flow have to be considered. It is well known, that unidirectional water flow  
106 can link plant populations over long distances due to water dispersal (hydrochory) (Kudoh &  
107 Whigham 1997, 2001; Kondo et al. 2009). This can lead to low genetic divergence along the  
108 river (Jacquemyn et al. 2006, Hu et al. 2010). Since seed dispersal by water is unidirectional,  
109 in some studies an increase of genetic diversity downriver could be observed (Nilsson et al.  
110 2010, Schleuning et al. 2011). These processes can only come into action in the active  
111 floodplain, not in the floodplain behind the dykes, where water flow is prevented. For sites in  
112 the inactive floodplain profound effects on the plant population level can be expected.  
113 However, knowledge regarding this topic is rare (Nilsson et al. 2010, but see Mosner et al.  
114 2012 for *Salix viminalis*).

115 In this study, we applied microsatellite and cpDNA markers to infer clonal patterns as well as  
116 gene flow and water dispersal processes in *Cnidium dubium* (Schkuhr) Thell. along a 400 km  
117 course of the Elbe River, Germany. *C. dubium* is a hemicryptophytic species of the Apiaceae.  
118 In Central Europe, it occurs predominantly in floodplain meadows along the corridors of large

119 rivers (Vent & Benkert 1984, Burkart 2001). Due to river regulation and floodplain  
120 fragmentation by dykes with subsequent intensification of land use as well as abandonment  
121 and drainage of floodplain and wetland meadows, populations are strongly declining (BfN  
122 2017). Interestingly and as an advantageous setting for our study the species occurs equally  
123 distributed in both the active and inactive floodplain of the Elbe River. *C. dubium* is listed as  
124 critically endangered in the Red List of vascular plants in Germany (RL status 2). Its habitats  
125 are listed in Annex I of the EU-Habitat Directive (code 6440: Alluvial meadows of river valleys  
126 of the alliance *Cnidion dubii*). In Germany, they are acutely threatened with extinction (RL 1,  
127 Finck et al. 2017). The largest remnants of *Cnidium* meadows in central Europe are to be found  
128 in the floodplains of the river Elbe, but their area has decreased continuously in recent  
129 decades as a result of changing land-use practices and trophic conditions.

130 We used nuclear microsatellite markers in order to unravel small-scale patterns of clonal  
131 structures as well as genetic diversity and differentiation along the river taking floodplain type  
132 (active/inactive) as well as the size of *Cnidium* patches (small/large) into account. Moreover,  
133 we applied chloroplast DNA markers to provide important information about the demographic  
134 history of the studied populations because their distribution is linked to seed dispersal events.  
135 Including both chloroplast haplotypic and nuclear microsatellite information we inferred  
136 historic and recent gene flow processes and linked them to discovered clonal structures.

137 Specifically, we aimed to answer the following questions:

- 138 1. How are clonal and genetic structures spatially organized within *C. dubium* patches and  
139 do the observed patterns point towards an extinction debt?
- 140 2. Are there differences in genetic diversity and differentiation regarding active and  
141 inactive floodplain as well as along the course of the Elbe River and do results suggest  
142 that water dispersal and other gene flow processes shape large scale population  
143 genetic structure?
- 144 3. Which conclusions can be drawn and what are promising measures for successful  
145 conservation and restoration of *C. dubium* populations and other endangered clonal  
146 plant species in floodplain ecosystems?

147

## 148 **Methods**

149 Sampling

150 Leaf material was sampled from *C. dubium* patches in May and October 2012. A sample is  
151 congruent with a leaf of a shoot and hereinafter termed “ramet” to address the potential  
152 clonality of *C. dubium* patches. Ramets were sampled from altogether 50 patches of *C. dubium*  
153 along the whole 400 km stretch of the Elbe River, where the species occurs (Figure 1, patch  
154 information in Supplement Table S1). 29 patches were located in the active floodplain and 21  
155 in the inactive floodplain (behind the dykes without flooding). We used a regular grid design  
156 of 3 x 3 m with grid cells of 1 x 1 m resulting in 16 grid points. In each *C. dubium* patch 13 to  
157 16 ramets were sampled. The patches found were often small and isolated without other  
158 patches in closer vicinity, i.e. the patch was often not much larger than the 3 x 3 m grid placed  
159 within. Other patches were embedded in larger stands. In September 2013, in 8 of the 50  
160 patches, which were of larger size than the average patch, we sampled additional leaf material  
161 in a grid of 10 x 10 m using grid cells of 2 x 2 m, which did not overlap with the small grid. From  
162 the maximum of 36 samples per grid, 20-21 samples were randomly chosen for analysis. The  
163 size of each sampled *C. dubium* patch was assessed by inspecting the patch size itself and the  
164 surrounding area (including the grassland where the patch occurred and grasslands in closer  
165 vicinity). Small scale distribution maps available for the Elbe floodplain region of Lower Saxony  
166 and Saxony-Anhalt and local botanists were consulted as well. In sum, we derived a  
167 classification criterion for “patch size” as an important response variable for statistical  
168 analyses. Thereafter, 31 of the 50 patches were classified as “small” and 19 patches as “large”  
169 (information about patch properties: Supplement S1).

170

171

172

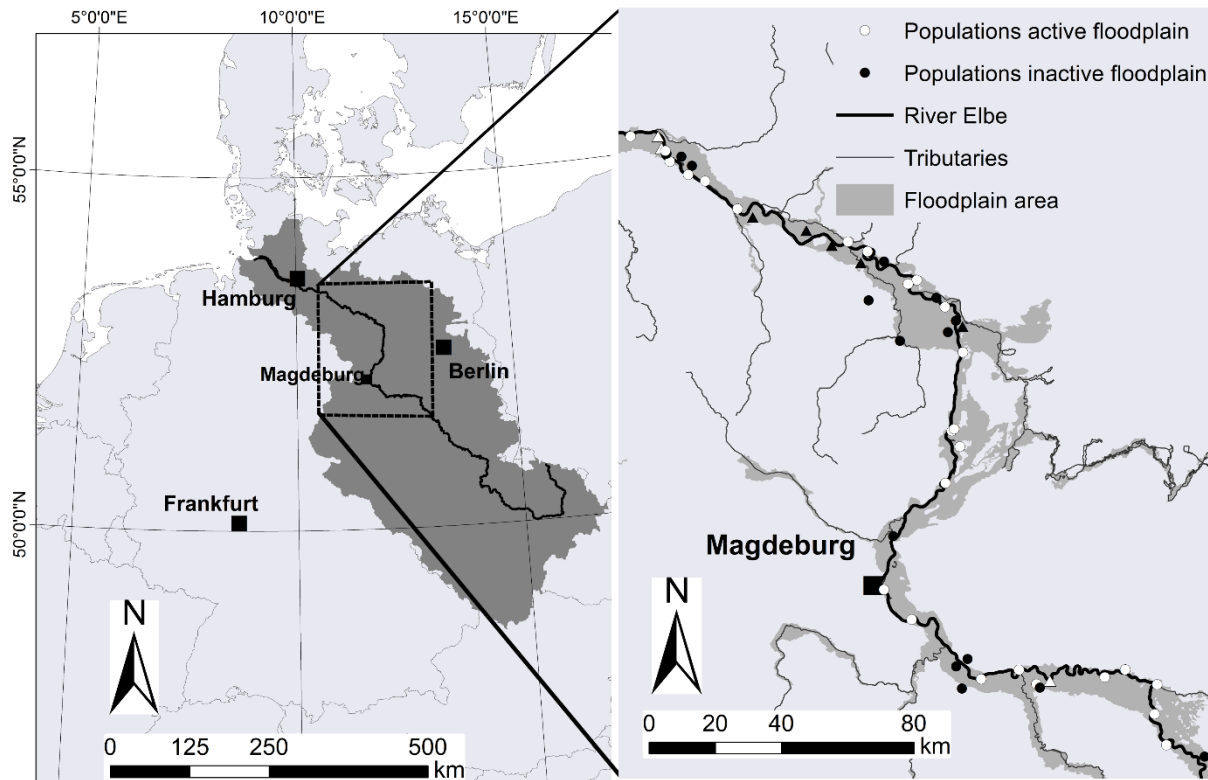

173  
174

175 Figure 1: left) Elbe River catchment (dark grey) with the sampling area (outlined square); right)  
176 Spatial distribution of the 50 sampled *C. dubium*-patches along the Elbe River stretch where *C.*  
177 *dubium* can be found. Circles: location of sampling in 3 x 3 m grids; triangles: location of sampling in  
178 both 3 x 3 m and 10 x 10 m grids.

179

### 180 Microsatellite and chloroplast DNA analysis

181 DNA was extracted from a total of 935 plants following the protocol as described in Dumolin  
182 et al. (1995) but using alkyltrimethylammonium bromide instead of cetyltrimethylammonium  
183 bromide and using 50µl of 1 x TE buffer with 10 µg/ml RNase to resuspend the purified DNA.  
184 Genotyping of all samples was conducted using six nuclear microsatellite markers (nSSRs):  
185 CnD613, CnD806, CnD722, CnD723, CnD814, CnD817 (Michalczyk et al. 2012). PCR reactions  
186 were performed in a volume of 16.6 µl containing PCR-buffer and 0.65 units of Taq-  
187 polymerase (Molegene, Sinn, Germany), 0.3 mM dNTPs (Biolone, Luckenwalde, Germany), 16  
188 mg/ml BSA (Thermo Fisher, St. Leon Rot, Germany), MgCl<sub>2</sub> (Molegene) according to Table 1  
189 and 20 ng of template DNA. Two different PCR profiles were used. For locus CnD723 a  
190 touchdown protocol was applied with an initial denaturation at 94 °C for 5 min followed by 10  
191 cycles of 94 °C for 40 s, annealing at initially 59 °C – 1 °C after each cycle for 45 s and elongation

192 at 72 °C for 40 s. Thereafter 20 cycles with a constant annealing temperature of 54 °C were  
193 performed followed by a final elongation at 72 °C for 10 min. The remaining microsatellite loci  
194 were amplified with the following protocol with individual annealing temperatures and hold  
195 times for denaturation and elongation according to Table 1: Initial denaturation at 94 °C for 5  
196 min was followed by 30 cycles (for CnD613 35 cycles) of denaturation at 94 °C, annealing at  
197 the respective temperature for 45 s and elongation at 72 °C finalized by elongation at 72 °C  
198 for 10 min.

199 Table 1: Locus specific concentrations of MgCl<sub>2</sub>, annealing temperatures and hold times during PCR  
200 cycles for 6 nuclear microsatellite loci of *C. dubium*

| Locus  | MgCl <sub>2</sub> conc. (mM) | Annealing temp. (°C) | Hold time (s) at 94°C/72°C |
|--------|------------------------------|----------------------|----------------------------|
| CnD814 | 3.0                          | 51                   | 45                         |
| CnD722 | 3.0                          | 56                   | 40                         |
| CnD806 | 3.0                          | 56                   | 30                         |
| CnD613 | 3.0                          | 54                   | 45                         |
| CnD817 | 2.4                          | 59                   | 30                         |
| CnD723 | 3.0                          | Touchdown, 54        | 40                         |

201

202 The amplification products were separated by capillary electrophoresis using a MegaBACE  
203 1000 automated sequencer (GE Healthcare, Freiburg, Germany). Fragment sizes were  
204 determined using the internal size standard MegaBACE ET400-R (60–400 bp; GE Healthcare)  
205 and alleles were scored with the software Fragment Profiler 1.2 (GE Healthcare).

206 For the analysis of chloroplast DNA (cpDNA) variation, we tested several regions of the  
207 chloroplast genome for sufficient polymorphism using universal primers. The most  
208 polymorphic regions, namely atpH/atpI (FM), trnT/trnF (TF) (Grivet et al. 2001) and trnH/trnK  
209 (HK) (Demesure et al. 1995) were used as markers in this study. One representative of each  
210 genet was analysed with the cpDNA markers and all samples which differed by just one allele  
211 from other genotypes; altogether 149 samples.

212 PCR reactions were performed in a volume of 30 µl with concentrations of Taq (Dream Taq,  
213 green, Thermo Fisher), dNTPs and BSA identical to the PCR protocol above. Concentrations of  
214 MgCl<sub>2</sub> were 2 mM for FM and HK and 2,63 mM for TF. An amount of 35 ng of template DNA  
215 was added to each reaction. The temperature profiles were initial denaturation at 94 °C for 5  
216 min, 40 (FM, HK) respectively 45 (TF) cycles of denaturation at 94 °C for 1 min, annealing at



217 56 °C (FM), 62 °C (HK) for 1 min or at 55 °C for 1 min 40s (TF), elongation at 72 °C for 1 min 30s  
218 (FM) or 1 min 40 s (HK, TF). All profiles were finalized with an elongation step at 72 °C for 10  
219 min. PCR products were sent for clean-up and sequencing to the company LGC Genomics  
220 (Berlin, Germany). Sequences were analysed with the software CodonCode Aligner Version  
221 7.1.2. From the sequence data, multilocus chloroplast haplotypes (hereinafter just called  
222 “haplotypes”) were identified.

223 Although chloroplast DNA is known to be maternally inherited in many angiosperms, this has  
224 not been determined specifically for *C. dubium* so far. To be on the safe side, we analysed  
225 multilocus haplotypes with the above mentioned cpDNA markers for four mother plants from  
226 the Elbe River from which we also collected seeds for cultivating off-spring. In all cases the  
227 chloroplast haplotype of the seedlings corresponded with that of the mother plants which  
228 suggests maternal inheritance of cpDNA in *C. dubium*.

229

#### 230 Handling of samples with presumed somatic mutations

231 In 16 out of the 50 3 x 3 m grids and four out of the eight 10 x 10 m grids samples occurred,  
232 which differed by just one SSR allele from other samples of the same grid forming a clone  
233 group. In most cases the fragment length difference corresponded to one single repeat motif.  
234 These samples were analysed several times in order to exclude genotyping errors. However,  
235 the differences remained after this procedure. The most plausible explanation is that these  
236 differences are the result of somatic mutations, which are predicted to be associated with the  
237 accumulation of somatic mutations in cell lineages (Schultz & Scofield 2009). It is unlikely that  
238 these differences could be the result of sexual reproduction, which is emphasized by the fact  
239 that we did not find samples with these small allele differences with differing chloroplast  
240 haplotypes. Since the assumed mutation model for microsatellites is a stepwise mutation of  
241 repeat motifs, we used a conservative approach and only assumed somatic mutation for those  
242 genotypes that differed by one allele only and therein by one repeat motif only (Ohta & Kimura  
243 1973). Consequently, we assigned these peculiar samples to the respective genet for further  
244 analyses (see genotype table, Supplement S2).

245

246

## 247 Data analysis

248 For the identification of clonal structures we used the “Multilocus Matches” option as  
249 implemented in GenAEx 6.503 (Peakall and Smouse, 2012). To assess the power of the  
250 multilocus system to differentiate genotypes, the probability of identity for unrelated  
251 individuals ( $PI$ ) and siblings ( $PI_{sibs}$ ) was estimated using GenAEx 6.503. To estimate intra-patch  
252 clonal diversity, we determined clonal diversity  $R$  as  $R = (G - 1)/(n - 1)$ , where  $G$  is the number  
253 of genets and  $n$  is the number of sampled ramets (Dorken & Eckert 2001).

254 In order to analyse the effects of patch and floodplain parameters on the spatial organisation  
255 of genets and ramets we screened each pair of samples within the grids for the presence of  
256 different genets. Based on this we introduced as response variable “probability of occurrence  
257 of non-clonal ramet pairs”. The presence/absence of non-clonal ramet pairs (ramet pairs of  
258 different genets) within all sampled grids together was related to small scale geographic  
259 distance using generalised linear models (GLM, with a binomial error structure). The  
260 geographic distances ranged from 1 - 4.24 m in the case of the 3 x 3 m grids and 2 - 14.14 m  
261 in the case of the 10 x 10 m grids. Further explanatory variables that were taken into account  
262 included the location of the patch relative to the dyke (active and inactive floodplain, variable  
263 “floodplain type”), the patch size in which the grid was embedded (large/small) and the  
264 number of chloroplast haplotypes in each studied patch. Furthermore, we calculated the  
265 genetic distance for each non-clonal ramet pair as response variable according to Smouse &  
266 Peakall (1999) using GenAEx 6.503. For this, pairwise genetic distances of zero (two ramets of  
267 the same genet) were removed from each grid. Samples with somatic mutations assigned to  
268 clone groups were excluded as well. Genetic distances were then analysed in relation to the  
269 above mentioned variables “geographic distance”, “floodplain type”, “patch size” and  
270 “haplotype number” using GLM with a poisson distributed error structure.

271 Clonal diversity of the patches was related to several explanatory variables regarding  
272 properties of the patches (patch size, haplotype number) and location (floodplain type:  
273 active/inactive; distance to river, location along the river: middle/lower stretch) using analysis  
274 of variance and linear regression. Models were checked for homoscedasticity and normal  
275 distribution of errors using diagnostic plots. The analyses were performed using R 3.4.2. (R  
276 Development Core Team, 2017). Further analyses of genetic structure and genetic diversity  
277 were based on a reduced dataset including only a single representative of each clone (in total

278 121 individuals). We performed a Bayesian clustering analysis using STRUCTURE 2.3.4  
279 (Pritchard et al. 2000) to search for evidence of population genetic structure. We applied  
280 STRUCTURE using the default settings (admixture model, correlated allele frequency model)  
281 and simulating for  $k=1$  to 8 with 5 replications each with 100,000 MCMC steps for burnin and  
282 100,000 steps after burnin. Results were evaluated using the CLUMPAK pipeline (Kopelman et  
283 al. 2015) for visualization of the barplots and for applying the delta K method according to  
284 Evanno et al. (2005). Furthermore, a Principal Coordinates Analysis (PCoA) based on pairwise  
285 genetic distances between genets as well as analyses of molecular variance (AMOVA) with 999  
286 permutations were performed in order to detect differentiation between patches of the active  
287 and inactive floodplain as well between the middle and the lower stretch of the Elbe river.  
288 Standard measures of genetic differentiation such as  $G'_{st}$  (Hedrick, 2005) and  $D_{est}$  (Jost, 2008)  
289 were determined among the same four groups of patches. These analyses were performed  
290 with the software GenAEx 6.503.

291

## 292 **Results**

293 The probability of identity (PID) of two randomly drawn individuals exhibiting the same  
294 genotype was  $2.3 \times 10^{-7}$  (1:4.4 million), for siblings  $4.4 \times 10^{-3}$  (1:226). This low value of PID  
295 assured sufficient power of the six microsatellite markers to differentiate among genets  
296 (Waits et al. 2001). From the altogether 935 analysed samples in the 3 x 3 m and 10 x 10 m  
297 grids, 121 different genotypes could be detected after removing genotypes with putative  
298 somatic mutations. From the 50 patches sampled in the 3 x 3 m grid, 31 patches exhibited only  
299 one single genet each forming a large ramet group. The 19 other patches (13 belonging to  
300 large sized, 6 to small patches contained 2 to 4 different genets each, but 4-genet patches  
301 were restricted to large patches of the inactive floodplain. Patches sampled in 10 x 10 m grids  
302 exhibited 2 to 8 different genotypes each (mean genets per patch in the active/inactive  
303 floodplain: 2.7/6.4). Ramets of the same genet could be detected over a distance of more than  
304 14 metres (diagonal edges of the large grid). A genet never occurred in more than one patch.  
305 This indicates that vegetative dispersal units were not dispersed over large distances between  
306 the investigated locations.

307 Altogether 18 multilocus chloroplast haplotypes could be detected of which 4 occurred  
308 frequently (frequency > 10%). Within each of 50 patches sampled with the 3 x 3 m grid one

309 (40 patches) or two haplotypes (10 patches) occurred. In each of six patches sampled with the  
310 10 x 10 m grid also one (3 patches) or two haplotypes (3 patches) occurred, while in two single  
311 patches three and four haplotypes were detected.

312 Small scale: genetic patterns within patches

313 The probability of occurrence of non-clonal ramet pairs (=ramet pairs of different genets) was  
314 significantly related to the geographic distance in both the 3 x 3 m and 10 x 10 m grid with an  
315 increase in probability of occurrence with increasing distance (Figure 2, Table 2). Additionally,  
316 the occurrence of non-clonal ramet pairs was more likely in patches of larger size and in the  
317 inactive floodplain. Also, it was more likely in patches exhibiting two instead of one haplotype  
318 (3 x 3 m grids) (Figs. 2 a,b). In the case of the 10 x 10 m grids the probability of occurrence  
319 increased from 1 to 4 haplotypes present in the grids (Figure 2 d).

320

321

322

323

324

325

326

327

328

329

330

331

332

333

334

335

336

337

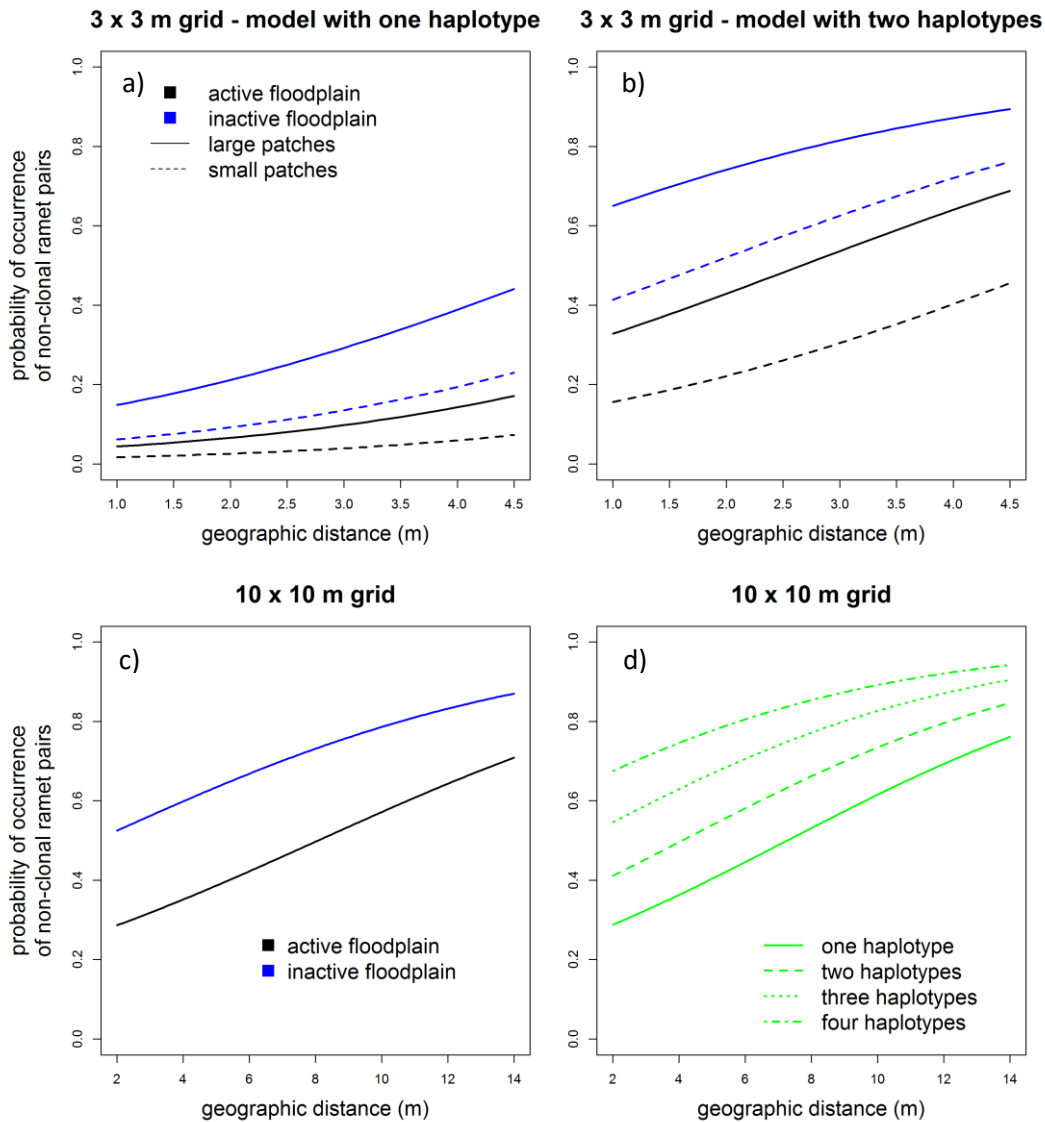

338

339 Figure 2: Probability of occurrence of non-clonal ramet pairs in relation to “geographic distance” and  
340 “floodplain type” in a) 3 x 3 m grids with one haplotype present, b) 3 x 3 m grids with two haplotypes  
341 present (here the “patch size” also included), c) 10 x 10 m grids and d) 10 x 10 m grids in relation to  
342 the number of haplotypes present in the grids.

343

344

345

346

347

348 Table 2: Results of GLM (binomial-family) with presence/absence of non-clonal ramet pairs as response  
349 variable. Data set: Samples of the 3 x 3 m grid from 50 patches and samples of the 10 x 10 m grid from  
350 8 patches. Explained deviance 3 x 3 m grid = 24.1 %; 10 x 10 m grid = 10.1 %. Bonferroni adjusted alpha  
351 levels: small grid:  $1.78 \times 10^{-7}$  (0.001/5598), large grid:  $6.49 \times 10^{-7}$  (0.001/1540).

352

|                       | Estimate | Std. Error | z-value | p           |
|-----------------------|----------|------------|---------|-------------|
| <b>3 x 3 m grid</b>   |          |            |         |             |
| Intercept             | -4.546   | 0.182      | -24.941 | < 0.001 *** |
| Geographic distance   | 0.431    | 0.049      | 8.811   | < 0.001 *** |
| Patch size            | -0.970   | 0.086      | -11.275 | < 0.001 *** |
| Floodplain type       | -1.338   | 0.093      | -14.442 | < 0.001 *** |
| Haplotype number      | 2.367    | 0.095      | 24.945  | < 0.001 *** |
| <b>10 x 10 m grid</b> |          |            |         |             |
| Intercept             | -1.240   | 0.199      | -6.234  | < 0.001 *** |
| Geographic distance   | 0.161    | 0.021      | 7.513   | < 0.001 *** |
| Floodplain type       | -0.819   | 0.114      | -7.213  | < 0.001 *** |
| Haplotype number      | 0.465    | 0.062      | 7.455   | < 0.001 *** |

353

354

355 Genetic distances among non-clonal ramet pairs in the 3 x 3m grids were significantly higher  
356 in patches of larger size and where two different haplotypes were present (Figure 3a,b, Table  
357 3). In the 10 x 10 m grids, genetic distance was higher in the inactive floodplain and increased  
358 with the number of haplotypes present. “Geographic distance” was not related to genetic  
359 distance in both grid sizes (Figs. 3c,d, Table 3).

360

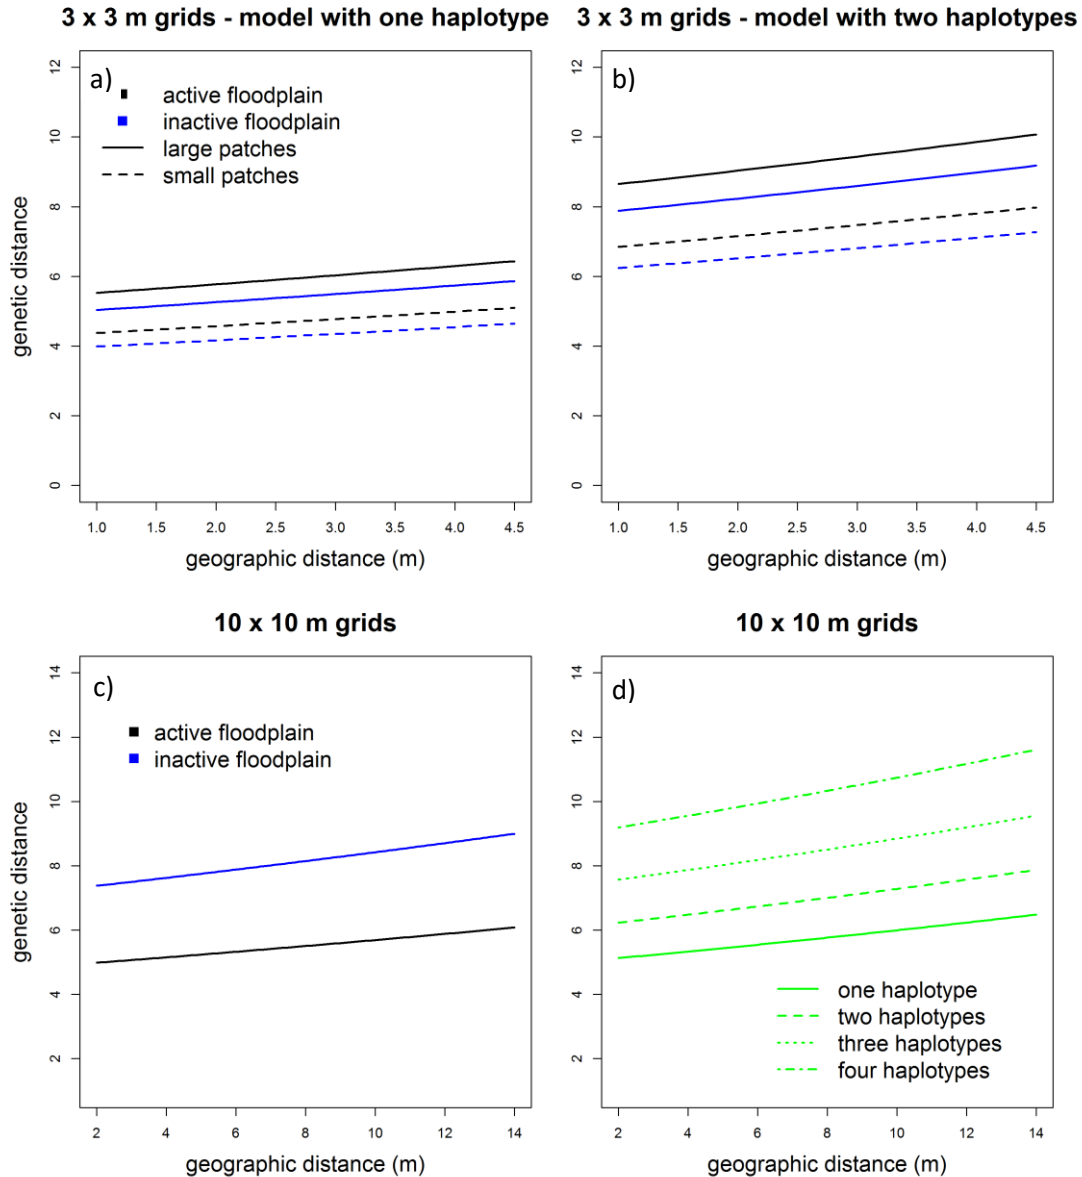

361

362

363 Figure 3: a) Genetic distances of non-clonal ramet pairs (ramet pairs of same genets excluded) in

364 relation to “geographic distance”, “floodplain type” and “patch size” in 3 x 3 m grids with one

365 haplotype present and b) with two haplotypes present, c) Genetic distances of non-clonal ramet pairs

366 in relation to “geographic distance” and “floodplain type” and d) in relation to “geographic distance”

367 and “number of haplotypes” in 10 x 10 m grids.

368

369

370

371

372 Table 3: Results of GLM (poisson-family) with genetic distance as response variable. Data set: Samples  
 373 of the 3 x 3 m grid from 50 patches and samples of the 10 x 10 m grid from eight patches. Explained  
 374 deviance 3 x 3 m grid = 22.1 %; 10 x 10 m grid = 19.3 %. Bonferroni adjusted alpha levels: 3 x 3 m grid:  
 375  $1.12 \times 10^{-6}$  (0.001/888), 10 x 10 m grid:  $1.13 \times 10^{-6}$  (0.001/879)

|                       | Estimate | Std. Error | z-value | p           |
|-----------------------|----------|------------|---------|-------------|
| <b>3 x 3 m grid</b>   |          |            |         |             |
| Intercept)            | 1.124    | 0.059      | 18.959  | < 0.001 *** |
| Geographic distance   | 0.044    | 0.015      | 2.894   | ns          |
| Patch size            | -0.233   | 0.029      | -8.139  | < 0.001 *** |
| Floodplain type       | 0.093    | 0.029      | 3.267   | ns          |
| Haplotype number      | 0.448    | 0.029      | 15.540  | < 0.001 *** |
| <b>10 x 10 m grid</b> |          |            |         |             |
| (Intercept)           | 1.555    | 0.047      | 33.341  | < 0.001 *** |
| Geographic distance   | 0.017    | 0.005      | 3.808   | ns          |
| Floodplain type       | -0.246   | 0.033      | -7.361  | < 0.001 *** |
| Haplotype number      | 0.156    | 0.012      | 13.228  | < 0.001 *** |

376

377 Large scale: genetic patterns along the Elbe River

378 Considering the intra-patch clonal diversity (based on the 50 3 x 3 m grids) it was significantly  
 379 related to the patch properties “patch size” and “haplotype number” (Table 4) while variables  
 380 related to the spatial distribution of patches (floodplain type, distance to river, river stretch,  
 381 river kilometre) had no significant effect.

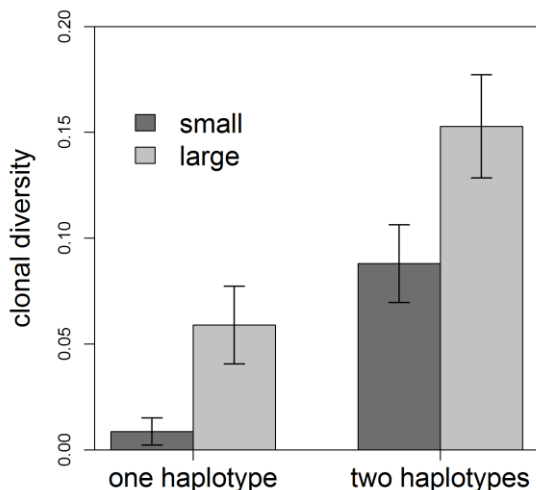

Figure 4: Intra-patch clonal diversity in relation to size and haplotype number of the patch. Due to the small number of patches sampled in 10 x 10 m grids only the 50 3 x 3 m grids were considered.

393

394

395



396

397

398 Table 4: Result of analysis of variance with intra-patch clonal diversity in relation to patch size and  
399 number of haplotypes per patch.

|                         | <b>d.f.</b> | <b>MS</b> | <b>F-value</b> | <b>p</b>   |
|-------------------------|-------------|-----------|----------------|------------|
| <b>Patch size</b>       | 1           | 0.04296   | 21.75          | <0.001 *** |
| <b>Haplotype number</b> | 1           | 0.054     | 23.79          | <0.001 *** |
| <b>Residuals</b>        | 47          | 0.00227   |                |            |

400

401 Regarding the genetic diversity and differentiation parameters no differences between recent  
402 and older floodplain and middle and lower stretch of the Elbe River could be detected (Table  
403 5). The PCoA showed no pattern for the grouping of samples neither for the river course nor  
404 for the floodplain type. This is consistent with the results of the Bayesian cluster analysis,  
405 which did not provide any evidence for population structure (Supplement S3).

406

407 Table 5: Average values of genetic diversity parameters (number of alleles:  $N_a$ ; effective number of  
408 alleles:  $N_e$ ; observed ( $H_o$ ) and expected ( $H_e$ ) heterozygosity; inbreeding coefficient: (F) for the active  
409 versus inactive floodplain patches as well as for the patches of the middle stretch of the Elbe River  
410 versus lower stretch patches.

| <b>Pop</b>      | <b><math>N_a</math></b> | <b><math>N_e</math></b> | <b><math>H_o</math></b> | <b><math>H_e</math></b> | <b>F</b> |
|-----------------|-------------------------|-------------------------|-------------------------|-------------------------|----------|
| <b>active</b>   | 11.333                  | 5.524                   | 0.641                   | 0.735                   | 0.117    |
| <b>inactive</b> | 10.000                  | 4.979                   | 0.655                   | 0.726                   | 0.090    |
| <b>middle</b>   | 9.833                   | 5.401                   | 0.653                   | 0.753                   | 0.114    |
| <b>lower</b>    | 11.000                  | 5.137                   | 0.647                   | 0.719                   | 0.095    |

411

412 The results of respective AMOVAs indicated that only 1-2 % of the molecular variance resided  
413 among populations (i.e. among active and inactive floodplain, among middle and lower  
414 stretch). Differentiation parameters  $G'_{st}$  and  $D_{est}$  values were also very low (active vs. inactive  
415 floodplain: 0.019/0.016; middle vs. lower stretch: 0.024/0.020).

416

417

418

## 419 **Discussion**

420 The analyses of the population genetic structure in *C. dubium* along the Elbe River revealed  
421 clear results on both considered spatial scales. Within-patch clonal diversity was found to be  
422 extremely low. Clear patterns were evident regarding the spatial organisation of clonal  
423 structures and their occurrence in relation to patch size and floodplain type. In contrast, we  
424 observed a complete lack of genetic structure on the large scale i.e. that neither differences  
425 between active and inactive floodplain nor along the river course regarding genetic diversity  
426 and differentiation parameters could be found.

427 Microsatellite marker analysis revealed that almost two thirds of the studied grids consisted  
428 of only one genet exhibiting a guerrilla like growth form (Lovett-Doust 1981). The results show  
429 clearly, that especially the small patches, not surrounded by other patches in the vicinity, are  
430 often monoclinal. It can be assumed that isolation of these monoclinal ramet groups provoke  
431 a lack of gene flow via pollen between genets which may be a reason for the absence of sexual  
432 reproduction. Furthermore, there is growing evidence that clonal growth can have negative  
433 effects on sexual reproduction e.g. due to strong trade-offs between investment in sexual and  
434 vegetative reproduction leading to limited allocation to flowering and seed production in case  
435 of rapid clonal expansion. Another aspect deals with the absence of mating groups required  
436 for outcrossing in large monoclinal ramet groups leading to inbreeding depression and pollen  
437 discounting associated with geitonogamous self-pollination (Barrett 2015). In the case of *C.*  
438 *dubium* a mixed mating system with cross- and self-fertilisation is mentioned in the literature  
439 (Chytrý et al. 2021). The observed inbreeding coefficients might indicate a moderate level of  
440 inbreeding. However, we may have introduced a bias by constructing “artificial populations”  
441 following our spatial categories of middle/lower river stretch or active/inactive floodplain for  
442 the purpose of estimating this coefficient. On the other hand, the observed levels of  
443 heterozygosity do not show evidence for high rates of self-fertilisation. Therefore, we think  
444 that the evidence rather supports a predominantly outcrossing mating system in a population  
445 not in equilibrium due to high levels of clonal reproduction (Reichel et al. 2016) and genetic  
446 isolation of the patches. This could result in the lack of seed development or viable seeds if  
447 mating partners are not present. Indeed, a low germination rate was shown in several  
448 germination experiments with *C. dubium* seeds of Rhine and Elbe River populations.

449 Germination percentage turned out to be much lower than in other floodplain- and flood-  
450 meadow species (Hölzel & Otte 2004, Hölzel 2005, Geissler & Gzik 2008, 2010).

451 Furthermore, clonal plants have indeterminate growth and are potentially immortal. The  
452 potentially high number of mitotic divisions between zygote formation and gamete  
453 production is considered to be associated with the accumulation of somatic mutations leading  
454 to slight DNA variation within clonal lineages. They are increasingly recognised as an important  
455 feature in clonally reproducing plants and long-lived trees (Schultz & Scofield 2009, Barrett  
456 2015). Somatic mutations at microsatellite loci have been observed e.g. in Rosaceae as well as  
457 Salicaceae species (see Jankowska-Wroblewska et al. 2016 for a summarisation). Indeed, also  
458 in our study samples occurred with single allele differences compared to adjacent groups of  
459 otherwise identical genotypes, which we considered to be somatic mutations. This points  
460 toward a comparatively high age of the corresponding genets (Ally et al. 2008). Somatic  
461 mutations are seen as a cause for the reduction in fertility in clonal plants due to a gradual  
462 accumulation of deleterious mutations transmitted from shoot meristems to gametes (Barrett  
463 2015). This could be a further reason for the observed low clonal diversity in studied *C. dubium*  
464 patches. Taken the facts as a whole, it can be assumed that the observed prolonged clonal  
465 growth may be a successful strategy to secure population persistence after the loss in area,  
466 connectivity and quality of habitats in the short term (de Witte & Stöcklin 2010). In the long  
467 term, however, this strategy might be detrimental.

468 By including the results of the cpDNA marker analysis, additional information on gene flow  
469 processes can be derived (Ziegenhagen et al. 2003). In about half of the patches, where more  
470 than one genet occurred, two haplotypes could be found. This is evidence that seeds of  
471 different mother plants germinated when these patches were established. It is not completely  
472 excluded in the one-haplotype patches that more than several mother plants with the same  
473 haplotype contributed seeds to the patch. However, it is more likely, that in most cases pollen  
474 from surrounding genets contributed to gene flow and that the different genets of the patch  
475 consisted of relatives thus having the same haplotype. This assumption is strongly supported  
476 by the higher genetic distances between ramets in two-haplotype patches in comparison with  
477 those in one-haplotype patches. We can conclude that gene flow by pollen and seeds as well  
478 as sexual reproduction is possible but it is strongly associated with large patches.

479 Surprisingly, the results indicate that sexual reproduction is at least slightly enhanced in the  
480 inactive compared to the active floodplain which is especially pronounced in the 10 x 10 m  
481 grid plots. Here, the number of genets per plot in the inactive floodplain was more than twice  
482 as high as in the active floodplain. Generally, reasons for the lack of sexual reproduction have  
483 often been associated with the lack of bare ground which is seen as a prerequisite for  
484 germination in many herbal plants and which is suggested for *C. dubium* as well (Geissler &  
485 Gzik 2010). If this is a main factor triggering sexual reproduction, a higher clonal diversity  
486 would be assumed in the active floodplain since erosional and depositional processes due to  
487 river flow are present and even accelerated in most cases due to the pronounced narrowing  
488 of the floodplains by dykes. However, the contrary is true in our study. Mosner et al. (2012)  
489 found also a higher clonal diversity in *Salix viminalis* stands in the inactive floodplain of the  
490 Elbe River. They identified mechanical forces through river flow in combination with long time  
491 flooding as drivers for intensive vegetative resprouting in the active floodplain. For *C. dubium*,  
492 Geissler & Gzik (2008) stated negative effects of extended flooding on seeds through inhibition  
493 of germination as well as remarkable decay rates which could be of higher importance in the  
494 active floodplain.

495 Regarding the genetic structure at the large scale considering the whole river stretch a clear  
496 lack of a genetic pattern can be stated. This finding suggests at first glance that gene flow acts  
497 efficiently across large distances along the Elbe River and also across the different floodplain  
498 types (active and inactive). It seems that one continuous population is present at the Elbe  
499 River which would be in line with an observed low differentiation of plant populations in  
500 dynamic river systems due to hydrochory (Hu et al. 2010). However, the above explained  
501 clonal organization of *C. dubium* within the studied patches provided a contrasting picture.  
502 The results suggest that the large scale lack of population structure observed in *C. dubium*  
503 along the Elbe River might not be the result of extensive gene flow across the landscape. It is  
504 justified to assume that gene flow is extremely low caused by the strong isolation of patches  
505 which hampers pollination. Moreover, gene flow by seeds seems to be even more restricted  
506 than by pollen due to limited germination and seedling establishment. Grassland  
507 intensification or abandonment in the active and inactive floodplain as well as the conversion  
508 into arable land in the inactive floodplain together with hydrological and hydraulic alterations  
509 of the river systems are the main reasons for the decline of the *Cnidium* flood-meadows during

510 the last decades (Finck et al. 2017) and therefore the reason for the assumed isolation of *C.*  
511 *dubium* patches in the river landscape.

512 Many patches may be remnants of former times in which *C. dubium* was more abundant due  
513 to environmental conditions more suitable for this plant. It seems to be conclusive that *C.*  
514 *dubium* is representing somewhat like a frozen population in the Elbe River region. This might  
515 explain the observed elevated inbreeding coefficients to some extent, since these might just  
516 reflect a population not in equilibrium. Thus *C. dubium* may be predestined to further decline  
517 due to the particularly low number of genets, their isolation through habitat fragmentation  
518 and deterioration, as well as restricted sexual reproduction. There is reason to presume that  
519 *C. dubium* is in the process of time-delayed extinction even without any further habitat loss  
520 occurring. Thus an extinction debt for the Elbe river population can be stated.

521 Considerable efforts are made by nature conservation authorities e.g. in the Elbe River and  
522 Upper Rhine River region to restore *Cnidium* flood-meadows. Hay transfer and application of  
523 threshing material from species-rich source stands containing seeds from target species  
524 proved to be a successful approach for restoration (Kiehl et al. 2010, Bischoff et al. 2018) while  
525 it is insufficient only to apply nature conservation management on degraded floodplain  
526 grasslands due to strong dispersal limitations of the target species (Donath et al. 2003) which  
527 is surely true for *C. dubium* as well. However, while many of these species arise after hay  
528 transfer, this measure is obviously not very successful in the case of *C. dubium* due to low  
529 germination rates of seeds transferred from the source populations (Hölzel et al. 2006).  
530 Instead, ramets of a number of different genets with parts of their roots should be planted in  
531 groups, which is easily possible as we could observe in a small side experiment within this  
532 study. We cut out three to four connected non-flowering ramets (including root and some  
533 soil) of eight studied patches with subsequent successful establishment in a common  
534 flowerbed. In the subsequent year many of the ramets of the verifiably different genets  
535 flowered and developed seeds. The subsequent sowing of seeds resulted in high germination  
536 rates of more than 70% (unpublished data). The open flowering of ramet groups of different  
537 genets obviously enhanced outcrossing and therefore successful sexual reproduction. Since  
538 no genetic differentiation could be determined the introduction of genets from a number of  
539 different patches via parts of roots seems promising for *C. dubium* re-establishment in  
540 restored flood meadows.

## 541 **Conclusions**

542 Having in mind the strong decline of this species in Central Europe, the findings give reason  
543 for great concern. The effective population size is much lower than the number of plants  
544 suggests and due to the identified extinction debt we can assume that the species is doomed  
545 to become extinct at the Elbe River. However, the identification of an unpaid extinction debt  
546 implies that there still is a chance to counteract the future extinction by targeted habitat  
547 restoration and conservation actions (Kuussaari et al. 2009). Nature conservation agencies  
548 should seize this opportunity and include suitable re-introduction measures into floodplain  
549 meadow restoration and conservation programs to keep *C. dubium* populations alive.

550

551

## 552 **Acknowledgement**

553 We thank Horst Jage (botanist, Kemberg) and Christiane Schreck (administration of the  
554 Biosphere Reserve “Elbe River Landscape”, Lower Saxony, Hitzacker) for giving valuable  
555 information on *C. dubium* locations at the Elbe River region. Furthermore, we are grateful to  
556 Lisa Thomas and to Filine Seele for sampling support and laboratory work. The authors  
557 declare no conflicts of interest. The study was funded by the German Research Foundation  
558 (DFG grant LE 1364/5-1).

559

560

## 561 **References**

- 562 Ally, D., Ritland, K., Otto, S.P. (2008) Can clone size serve as a proxy for clone age? An  
563 exploration using microsatellite divergence in *Populus tremuloides*. *Molecular*  
564 *Ecology* 17, 4897–4911. <http://doi.org/10.1111/j.1365-294X.2008.03962.x>
- 565 Barrett, S.C.H. (2015) Influences of clonality on plant sexual reproduction. *PNAS*, 112, 8859-  
566 8866.
- 567 Bischoff, A., Hoboy, S., Winter, N. & Warthemann, G. (2018) Hay and seed transfer to re-  
568 establish rare grassland species and communities: how important are date and soil  
569 preparation? *Biological Conservation* 221, 182-189.
- 570 BfN (Bundesamt für Naturschutz) (2017) Gefährdung und Schutz von *Selinum dubium*  
571 (Schkuhr) in Deutschland.  
572 <http://www.floraweb.de/pflanzenarten/gefaerdung.xsql?sipnr=1597&> (Retrieved  
573 30/11/2017).

- 574 BMU & BfN (Bundesministerium für Umwelt, Naturschutz und Reaktorsicherheit &  
575 Bundesamt für Naturschutz) (2009) Auenzustandsbericht – Flussauen in Deutschland.  
576 [http://www.bmu.de/files/pdfs/allgemein/application/pdf/auenzustandsbericht\\_bf.p](http://www.bmu.de/files/pdfs/allgemein/application/pdf/auenzustandsbericht_bf.pdf)  
577 [df](http://www.bmu.de/files/pdfs/allgemein/application/pdf/auenzustandsbericht_bf.pdf).
- 578 Bobiwash K., Schultz S.T. & Schoen D.J. (2013) Somatic deleterious mutation rate in a woody  
579 plant: Estimation from phenotypic data. *Heredity*, 111, 338–344.
- 580 Bulman, C.R., Wilson, R.J., Holt, A.R., Galvez Bravo, L., Early, R.I., Warren, M.S. & Thomas,  
581 C.D. (2007) Minimum viable metapopulation size, extinction debt, and the  
582 conservation of a declining species. *Ecological Applications*, 17, 1460-1473.
- 583 Burkart, M. (2001) River corridor plants (Stromtalpflanzen) in Central European lowland: A  
584 review of a poorly understood plant distribution pattern. *Global Ecology &*  
585 *Biogeography*, 10, 449-468.
- 586 Chytrý M., Danihelka J., Kaplan Z., Wild J., Holubová D., Novotný P., Řezníčková M., Rohn M.,  
587 Dřevojan P., Grulich V., Klimešová J., Lepš J., Lososová Z., Pergl J., Sádlo J., Šmarda P.,  
588 Štěpánková P., Tichý L., Axmanová I., Bartušková A., Blažek P., Chrtek J. Jr., Fischer F.  
589 M., Guo W.-Y., Herben T., Janovský Z., Konečná M., Kühn I., Moravcová L., Petřík P.,  
590 Pierce S., Prach K., Prokešová H., Štech M., Těšitel J., Těšitelová T., Večeřa M., Zelený  
591 D. & Pyšek P. (2021) Pladias Database of the Czech Flora and Vegetation. – *Preslia* 93:  
592 1–87. <https://doi.org/10.23855/preslia.2021.001>.
- 593 Colling, G. & Matthies, D. (2006) Effects of habitat deterioration on population dynamics and  
594 extinction risk of an endangered, long-lived perennial herb (*Scorzonera humilis*).  
595 *Journal of Ecology*, 94, 959 – 972. [https://doi: 10.1111/j.1365-2745.2006.01147.x](https://doi:10.1111/j.1365-2745.2006.01147.x)
- 596 Demesure, B., Sodzi, N. & Petit, R.J. (1995) A set of universal primers for amplification of  
597 polymorphic non-coding regions of mitochondrial and chloroplast DNA in plants.  
598 *Molecular Ecology*, 4, 129–131.
- 599 Diamond, J.M. (1972). Biogeographic kinetics: estimation of relaxation times for avifaunas of  
600 southwest pacific islands. *Proceedings of the National Academy of Sciences of the*  
601 *United States of America*. 69, 3199–3203. <https://doi:10.1073/pnas.69.11.3199>
- 602 Donath, T.W., Hölzel, N. & Otte, A. (2003) The impact of site conditions and seed dispersal  
603 on restoration success in alluvial meadows. *Applied Vegetation Science*, 6, 13–22.
- 604 Dorken, M.E. & Eckert, C.G. (2001) Severely reduced sexual reproduction in northern  
605 populations of a clonal plant, *Decodon verticillatus* (Lythraceae). *Journal of Ecology*,  
606 89, 339–350.
- 607 Dumolin, S., Demesure, B. & Petit, R.J. (1995) Inheritance of chloroplast and mitochondrial  
608 genomes in pedunculate oak investigated with an efficient PCR method. *Theoretical*  
609 *and Applied Genetics*, 91, 1253-1256.
- 610 Duwe, V.K., Muller L.A.H., Borsch T. & Ismail, S.A. (2017) Pervasive genetic differentiation  
611 among Central European populations of the threatened *Arnica montana* L. and  
612 genetic erosion at lower elevations. *Perspectives in Plant Ecology, Evolution and*  
613 *Systematics*, 27, 45–56. <https://doi.org/10.1016/j.ppees.2017.02.003>
- 614 Evanno, G., Regnaut, S. & Goudet, J. (2005) Detecting the number of clusters of individuals  
615 using the software STRUCTURE: a simulation study. *Molecular Ecology*, 14, 2611–  
616 2620.

- 617 Fahrig, L. (2003) Effects of Habitat Fragmentation on Biodiversity. *Annual Review of Ecology,*  
618 *Evolution, and Systematics*, 34, 487-515.  
619 <https://doi.org/10.1146/annurev.ecolsys.34.011802.132419>
- 620 Finck, P., Heinze, S., Raths, U., Riecken, U. & Ssymank, A. (2017) Rote Liste der gefährdeten  
621 Biotoptypen Deutschlands – dritte fortgeschriebene Fassung. *Naturschutz und*  
622 *Biologische Vielfalt*, 156.
- 623 Geissler, K. & Gzik, A. (2008) Ramet demography and ecological attributes of the perennial  
624 river corridor plant *Cnidium dubium* (Schkuhr) Thell. (Apiaceae). *Flora*, 203, 396-408.
- 625 Geissler, K. & Gzik, A. (2010) Germination ecology of three endangered perennial river  
626 corridor plants in relation to their preferred occurrence. *Flora*, 205, 590-598.
- 627 Grivet, D., Heinze, B., Vendramin, G.G. & Petit, R.J. (2001) Genome walking with consensus  
628 primers: application to the large single copy region of chloroplast DNA. *Molecular*  
629 *Ecology Notes*, 1, 345–349.
- 630 Hanski, I. & Ovaskainen, O. (2002). Extinction debt at extinction threshold. *Conservation*  
631 *Biology*, 16, 666-673. <https://doi:10.1046/j.1523-1739.2002.00342.x>
- 632 Hedrick, P. (2005). A standardized genetic differentiation measure. *Evolution*, 59(8), 1633–  
633 1638.
- 634 Helm, A., Hanski, I., & Partel, M. (2005) Slow response of plant species richness to habitat  
635 loss and fragmentation. *Ecology Letters*, 9, 72–77. [https://doi:10.1111/j.1461-](https://doi:10.1111/j.1461-0248.2005.00841.x)  
636 [0248.2005.00841.x](https://doi:10.1111/j.1461-0248.2005.00841.x)
- 637 Hölzel, N. (2005) Seedling recruitment in flood-meadow species: The effects of gaps, litter  
638 and vegetation matrix. *Applied Vegetation Science*, 8, 115-224.
- 639 Hölzel, N. & Otte, A. (2004). Ecological significance of seed germination characteristics in  
640 flood-meadow species. *Flora*, 199: 12-24.
- 641 Hölzel, N., Bissels, S., Donath, T.W., Handke, K., Harnisch, M. & Otte, A. (2006) Renaturierung  
642 von Stromtalwiesen am hessischen Oberrhein. *Naturschutz und Biologische Vielfalt*  
643 31. Bonn-Bad Godesberg: BfN-Schriftenvertrieb im Landwirtschaftsverlag.
- 644 Honnay, O., Jacquemyn, H., & Bossuyt, B. et al. (2005) Forest fragmentation effects on patch  
645 occupancy and population viability of herbaceous plant species. *New Phytologist*,  
646 166, 723-736.
- 647 Honnay, O. & Bossuyt, B. (2005) Prolonged clonal growth: escape route or route to  
648 extinction? *Oikos*, 108, 427–432.
- 649 Hu, L.J., Uchiyama, K., Shen, H.L. & Ide, Y. (2010) Multiple-scaled spatial genetic structures of  
650 *Fraxinus mandshurica* over a riparian-mountain landscape in Northeast China.  
651 *Conservation Genetics*, 11, 77–87.
- 652 Hylander, K., Ehrlén, J. (2013). The mechanisms causing extinction debts. *Trends in Ecology &*  
653 *Evolution*, 28, 341-346. [https://doi: 10.1016/j.tree.2013.01.010](https://doi:10.1016/j.tree.2013.01.010)
- 654 Jacquemyn, H., Honnay, O., van Looy, K. & Breyne, P. (2006) Spatiotemporal structure of  
655 genetic variation of a spreading plant metapopulation on dynamic riverbanks along  
656 the Meuse River. *Heredity*, 96, 471–478.



- 657 Jankowska-Wroblewska, S., Meyza, K., Sztupecka, E., Kubera, L., Burczyk, J. (2016) Clonal  
658 structure and high genetic diversity at peripheral populations of *Sorbus torminalis* (L.)  
659 Crantz. i Forest, 9, 892-900.
- 660 Jost, L. (2008). GST and its relatives do not measure differentiation. *Molecular Ecology*,  
661 17(18), 4015–4026. <https://doi.org/10.1111/j.1365-294X.2008.03887.x>
- 662 Kiehl, K., Kirmer, A., Donath, T., Rasran, L. & Hoelzel, N. (2010) Species introduction in  
663 restoration projects - Evaluation of different techniques for the establishment of  
664 semi-natural grasslands in Central and Northwestern Europe. *Basic and Applied  
665 Ecology*, 11, 285-299.
- 666 Kondo, T., Nakagoshi, N. & Isagi, Y. (2009) Shaping of genetic structure along pleistocene and  
667 modern river systems in the hydrochorous riparian Azalea, *Rhododendron ripense*  
668 (Ericaceae). *American Journal of Botany*, 96, 1532–1543.
- 669 Kopelman, N.M., Mayzel, J., Jakobsson, M., Rosenberg N.A. & Mayrose I. (2015) Clumpak: a  
670 program for identifying clustering modes and packaging population structure  
671 inferences across K. *Molecular Ecology Resources*, 15, 1179–1191.  
672 <https://doi.org/10.1111/1755-0998.12387>.
- 673 Kuussaari, M., Bommarco, R., Heikkinen, R. K., Helm, A., Krauss, J., Lindborg, R., Öckinger, E.,  
674 Pärtel, M., Pino, J., Rodà, F., Stefanescu, C., Teder, T., Zobel, M. & Steffan-Dewenter,  
675 I. (2009). Extinction debt: a challenge for biodiversity conservation. *Trends in Ecology  
676 & Evolution*. 24 (10): 564–71. <https://doi.org/10.1016/j.tree.2009.04.011>
- 677 Krauss, J., Bommarco, R., Guardiola, M., Heikkinen, R.K., Helm, A., Kuussaari, M., Lindborg, R.,  
678 Öckinger, E., Pärtel, M., Pino, J., Pöyry, J., Raatikainen, K.M., Sang, A., Stefanescu, C.,  
679 Teder, T., Zobel, M. & Steffan-Dewenter, I. (2010) Habitat fragmentation causes  
680 immediate and time-delayed biodiversity loss at different trophic levels. *Ecology  
681 Letters* 13, 597-605.
- 682 Kudoh, H. & Whigham, D.F. (1997) Microgeographic genetic structure and gene flow in  
683 *Hibiscus moscheutos* (Malvaceae) populations. *American Journal of Botany*, 84, 1285–  
684 1293.
- 685 Kudoh, H. & Whigham, D.F. (2001) A genetic analysis of hydrologically dispersed seeds of  
686 *Hibiscus moscheutos* (Malvaceae). *American Journal of Botany*, 88, 588–593.
- 687 Lee, S.R., Choi J.E. & Lee, B.Y., Yu, J.N., & Lim, C.E. (2018) Genetic diversity and structure of  
688 an endangered medicinal herb: implications for conservation. *AoB PLANTS* 10:  
689 <https://doi.org/10.1093/aobpla/ply021>.
- 690
- 691 Lehner, B., Liermann, C.R., Revenga, C., Vörösmarty, C., Fekete, B., Crouzet, P., Döll, P.,  
692 Endejan, M., Frenken, K., Magome, J., Nilsson, C., Robertson, J.C., Rödel, R., Sindrof,  
693 N. & Wisser, D. (2011) High-resolution mapping of the world's reservoirs and dams  
694 for sustainable river-flow management. *Frontiers in Ecology and the Environment*, 9,  
695 494–502. <https://doi.org/10.1890/100125>
- 696 Leyer, I. (2005) Predicting plant species' responses to river regulation: the role of water level  
697 fluctuations. *Journal of Applied Ecology*, 42, 239-250.
- 698 Lindborg, R., & Eriksson, O. (2004). Historical landscape connectivity affects present plant  
699 species diversity. *Ecology*, 85(7), 1840–1845. <https://doi.org/10.1890/04-0367>

- 700 Llorens, T.M., Ayre D.J. & Whelan R.J. (2018) Anthropogenic fragmentation may not alter  
701 pre-existing patterns of genetic diversity and differentiation in perennial shrubs.  
702 *Molecular Ecology* 27:1541–1555. <https://doi.org/10.1111/mec.14552>  
703
- 704 Lovett-Doust L. (1981) Population dynamics and local specialization in a clonal perennial  
705 (*Ranunculus repens*). *Journal of Ecology*, 69, 743–755.
- 706 Michalczyk, I. M., Schumacher, C., Mengel, C., Leyer, I. & Liepelt, S. (2011) Identification and  
707 characterization of 12 microsatellite loci in *Cnidium dubium* (Apiaceae) using next  
708 generation sequencing. *American Journal of Botany, Primer Notes & Protocols*, e127-  
709 e129.
- 710 Mosner, E., Liepelt, S., Ziegenhagen, B. & Leyer, I. (2012) Floodplain willows in fragmented  
711 river landscapes: understanding spatio-temporal genetic patterns as a basis for  
712 restoration plantings. *Biological Conservation*, 153, 211-218.
- 713 Mortelliti, A., Fagiani, S., Battisti, C., Capizzi, D. & Boitani, L. (2010) Independent effects of  
714 habitat loss, habitat fragmentation and structural connectivity on forest-dependent  
715 birds. *Diversity and Distributions*, 48, 153-162. [https://doi.org/10.1111/j.1365-  
716 2664.2010.01918.x](https://doi.org/10.1111/j.1365-2664.2010.01918.x)
- 717 Nilsson, C., Brown, R. L., Jansson, R. & Merritt, D.M. (2010) The role of hydrochory in  
718 structuring riparian and wetland vegetation. *Biological Reviews*, 85, 837-858.
- 719 Ohta, T. & Kimura, M. (1973) A model of mutation appropriate to estimate the number of  
720 electrophoretically detectable alleles in a finite population. *Genetical Research*, 22,  
721 201-204.
- 722 Peakall, R. and Smouse P.E. (2012) GenAlEx 6.5: genetic analysis in Excel. Population genetic  
723 software for teaching and research-an update. *Bioinformatics* 28, 2537-2539.
- 724 Pennings, S.C., Callaway, R.M. (2000) The advantages of clonal integration under different  
725 ecological conditions: a community-wide test. *Ecology*, 8, 709-716.
- 726 Pritchard, J.K., Stephens, M. & Donnelly, P. (2000) Inference of population structure using  
727 multilocus genotype data. *Genetics*, 155, 945–959.
- 728 R Development Core Team (2017) R: A language and environment for statistical computing,  
729 R Foundation for Statistical Computing, Vienna, Austria.
- 730 Reichel, K., Masson, J.-P., Malrieu, F., Arnaud-Haond, S., & Stoeckel, S. (2016) Rare sex or out  
731 of reach equilibrium? The dynamics of FIS in partially clonal organisms. *BMC  
732 Genetics*, 17, 76. <https://doi.org/10.1186/s12863-016-0388-z>
- 733 Sang, A., Teder, T., Helm, A., & Pärtel, M. (2010). Indirect evidence for an extinction debt of  
734 grassland butterflies half century after habitat loss. *Biological Conservation*, 143,  
735 1405. <https://doi.org/10.1016/j.biocon.2010.03.015>
- 736 Schindler, S., O’Neill, F.H., Biro, M., Damm, C., Gasso, V., Kanka, R., van der Sluis, T., Krug, A.,  
737 Lauwaars, S.G., Sebesvari, Z., Pusch, M., Baranovsky, B., Ehlert, T., Neukirchen, B.,  
738 Martin, J.R., Euller, K., Mauerhofer, V. & Wrbka, T. (2016) Multifunctional floodplain  
739 management and biodiversity effects: a knowledge synthesis for six European  
740 countries. *Biodiversity and Conservation*, 25, 1349–1382. [https://doi  
741 10.1007/s10531-016-1129-3](https://doi.org/10.1007/s10531-016-1129-3)

- 742 Schleuning, M., Becker, T., Vadillo, G.P., Hahn, T., Matthies, D. & Durka, W. (2011) River  
743 dynamics shape clonal diversity and genetic structure of an Amazonian understory  
744 herb. *Journal of Ecology*, 99, 373-382.
- 745 Schultz, S.T. & Scofield, D.G. (2009) Mutation accumulation in real branches: Fitness assays  
746 for genomic deleterious mutation rate and effect in large-statured plants. *American*  
747 *Naturalist* 174, 163-175.
- 748 Smouse, P.E. & Peakall, R. (1999) Spatial autocorrelation analysis of individual multiallele and  
749 multilocus genetic structure. *Heredity*, 82, 561-573.
- 750 Stuefer, J. F., de Kroon, H. & During, H. J. (1996) Exploitation of environmental heterogeneity  
751 by spatial division of labour in a clonal plant. *Functional Ecology*, 10, 328-334.
- 752 Tilman, D., May, R. M., Lehman, C. L. & Nowak, M. A. (1994). Habitat destruction and the  
753 extinction debt. *Nature*, 371, 65-66. [https://doi:10.1038/371065a0](https://doi.org/10.1038/371065a0)
- 754 Tilman, D., Reich, P.B., Knops, J., Wedin, D., Mielke, T. & Lehman, C. (2001) Diversity and  
755 productivity in a long-term grassland experiment. *Science*, 294, 843-845.  
756 [https://doi:10.1126/science.1060391](https://doi.org/10.1126/science.1060391)
- 757 Tepedino (2012) Overestimating population sizes of rare clonal plants. *Conservation Biology*,  
758 26, 945-947. [https://doi: 10.1111/j.1523-1739.2012.01886.x](https://doi.org/10.1111/j.1523-1739.2012.01886.x)
- 759 Tschardt, T., Batáry, P., Dormann, C.F. (2011): Set-aside management: How do succession,  
760 sowing patterns and landscape context affect biodiversity? *Agriculture, Ecosystems*  
761 *and Environment*, 143, 37- 44.
- 762 Vallejo-Marín, M., Marcel E. Dorken, M.E., Spencer C.H. & Barrett, S.C.H. (2010) The  
763 ecological and evolutionary consequences of clonality for plant mating. *Annual*  
764 *Review of Ecology, Evolution, and Systematics*, 41, 193-213. [https://doi](https://doi.org/10.1146/annurev.ecolsys.110308.120258)  
765 [10.1146/annurev.ecolsys.110308.120258](https://doi.org/10.1146/annurev.ecolsys.110308.120258)
- 766 Vent, W. & Benkert, D. (1984) Verbreitungskarten brandenburgischer Pflanzenarten. 2.  
767 Reihe. *Stromtalpflanzen* (1). *Gleditschia*, 12, 213-238.
- 768 Waits, L.P., Luikart, G. & Taberlet, P. (2001) Estimating the probability of identity among  
769 genotypes in natural populations: cautions and guidelines. *Molecular Ecology*, 10,  
770 249-256.
- 771 de Witte, L.C., Stöcklin, J. (2010) Longevity of clonal plants: why it matters and how to  
772 measure it. *Annals of Botany*, 106, 859-870.
- 773 Ziegenhagen, B., Bialozyt, R., Kuhlenkamp, V., Schulze, I., Ulrich, A., & Wulf, M. (2003) Spatial  
774 patterns of maternal lineages and clones of *Galium odoratum* in a large ancient  
775 woodland: inferences about seedling recruitment. *Journal of Ecology*, 91, 587-586.  
776 <https://doi.org/10.1046/j.1365-2745.2003.00801.x>
- 777 Young, A., Boyle, T., & Brown, A.H.D (1996) The population genetic consequences of habitat  
778 fragmentation for plants. *Trends in Ecology and Evolution*, 11, 413-418.  
779
- 780 Author's contributions
- 781 IL, SL and BZ conceived the ideas and designed methodology; IL, EM and CM collected the  
782 data; IL, SL and EM analysed the data; IL led the writing of the manuscript. All authors  
783 contributed critically to the drafts and gave final approval for publication.
- 784

785 Data archiving statement

786 We intend to archive genotyping data of all collected samples for the microsatellite as well as  
787 cpDNA data in the Dryad Digital Repository (<http://datadryad.org/>)

788

789

790

791

792

793

794

795

796

797
